# Supplementary material
Source: PubMed Central journal article supplement (PMC4457951)
Supplement: mmc1.pdf [file mmc1.pdf]

**The American Journal of Human Genetics**

**Supplemental Data**

**Recessive Mutations in the  
 $\alpha 3$  (VI) Collagen Gene *COL6A3*  
Cause Early-Onset Isolated Dystonia**

**Michael Zech, Daniel D. Lam, Ludmila Francescatto, Barbara Schormair, Aaro V. Salminen, Angela Jochim, Thomas Wieland, Peter Lichtner, Annette Peters, Christian Gieger, Hanns Lochmüller, Tim M. Strom, Bernhard Haslinger, Nicholas Katsanis, and Juliane Winkelmann**

**Figure S1** The c.8966-1G>C mutation results in skipping of *COL6A3* exon 41

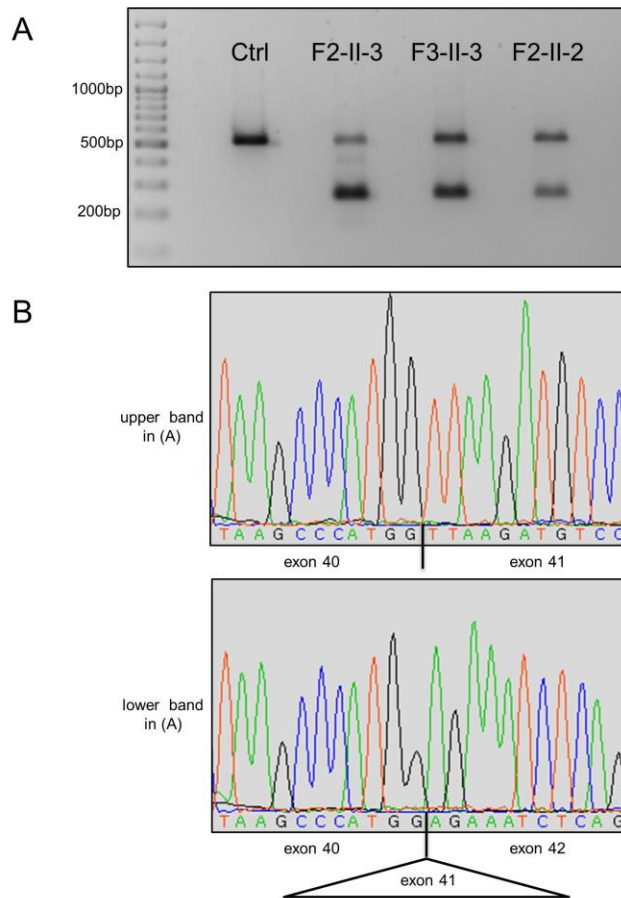

(A) cDNA gel electrophoresis showing an additional band in individuals carrying the canonical splice site variant c.8966-1G>C (individuals II-2 and II-3 of family F2, individual II-3 of family F3, Figure 1) but not in a normal control subject (Ctrl). (B) Sanger sequencing of cDNA corresponding to the upper band in (A) (522bp) reveals a normal transcript structure whereas the lower band in (A) (258bp) represents a transcript without exon 41. Primer pairs used are denoted in Table S8 and PCR conditions are available upon request.

**Figure S2** Immunostaining of collagen VI in dermal fibroblast cultures

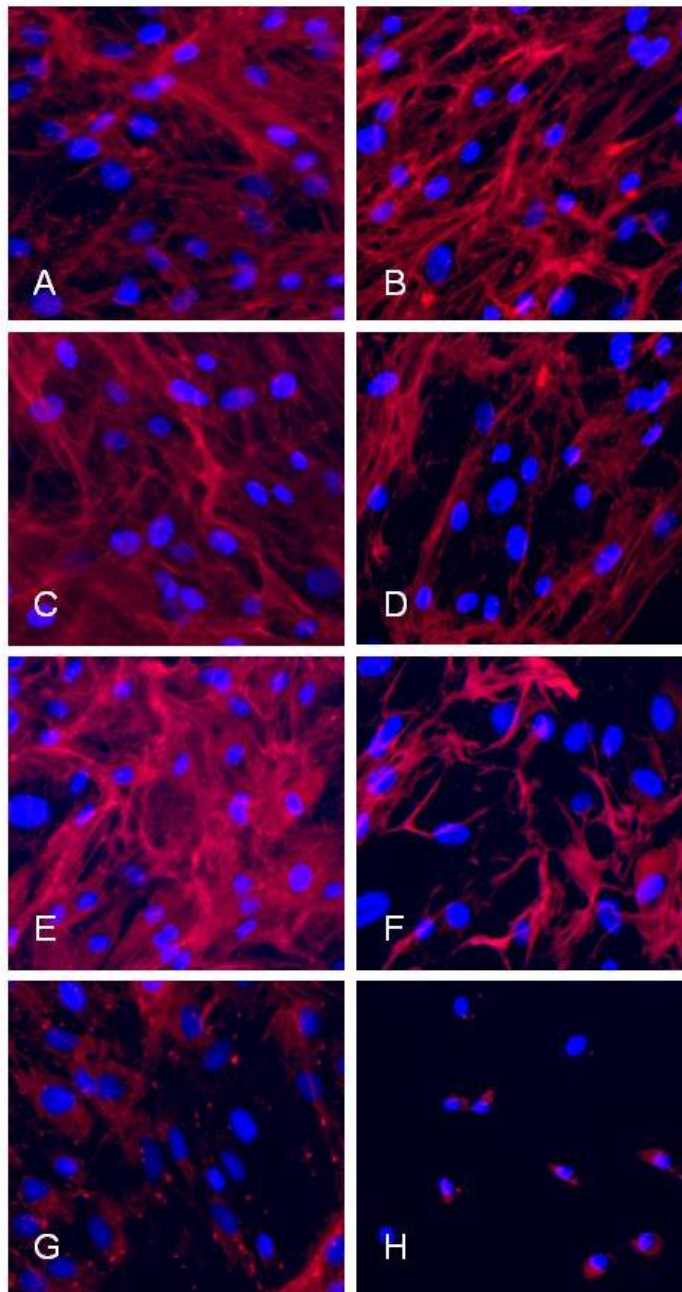

In a control subject (A), a healthy heterozygous *COL6A3* mutation carrier (individual F1-II-1, B), and isolated dystonia probands carrying compound heterozygous *COL6A3* mutations (individuals F1-III-1 [C], F1-III-3 [D], F2-II-3 [E], F3-II-3 [F]), collagen VI is highly expressed and effectively secreted into the extracellular space, where it forms beaded microfibrils (red matrix). In contrast, the protein is diminished in amount and displays an abnormal stippling pattern in an individual with Bethlem myopathy (G), and is extracellularly absent with some intracellular retention in an individual with Ullrich congenital muscular dystrophy (H). Cell nuclei were stained with DAPI (blue dots).

**Figure S3** Expression of *Col6a3* in different mouse brain regions

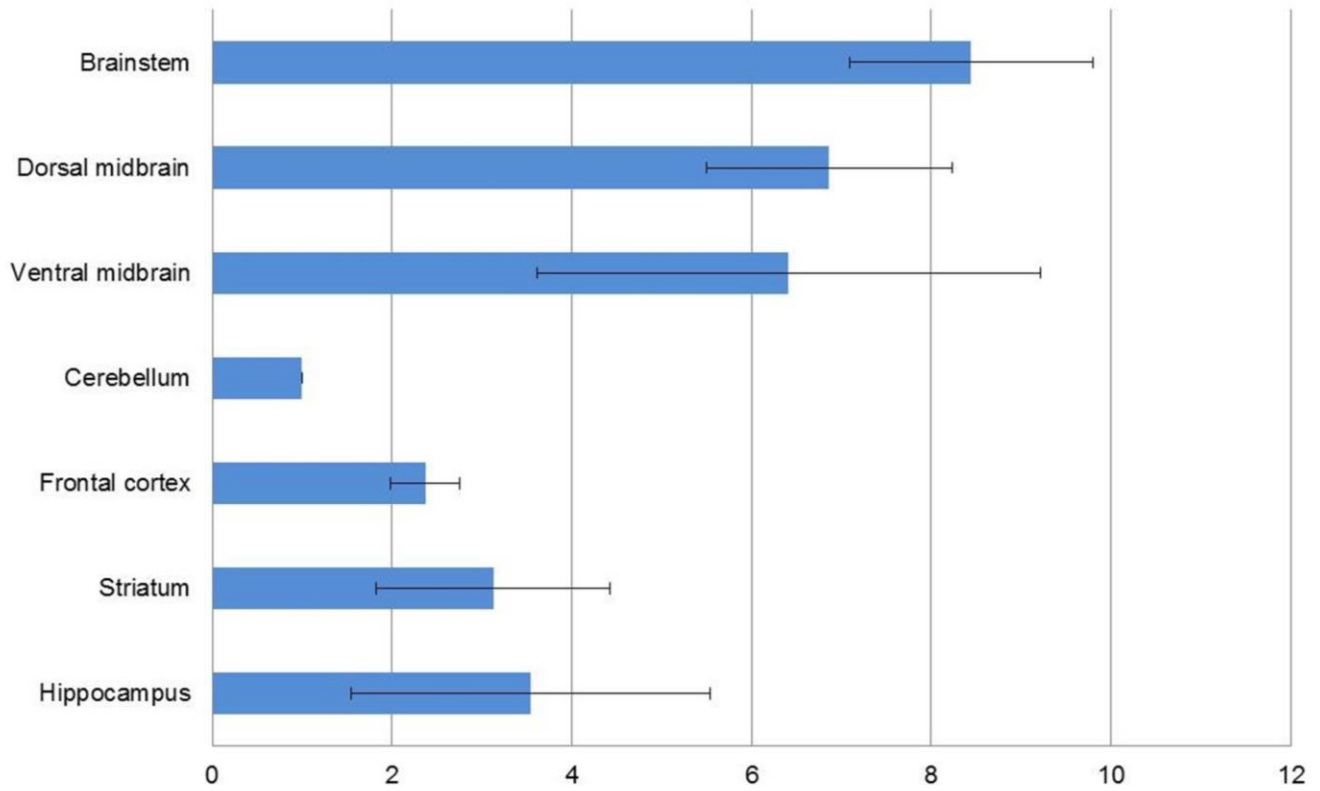

With QRT-PCR, relative expression of *Col6a3* was analyzed in seven different adult mouse brain regions. Relative mRNA expression levels are depicted as the fold change compared with the sample exhibiting the lowest expression. Average levels of three independent mice are shown. Error bars represent standard deviation.

**Figure S4** *In situ* hybridization of coronal mouse brain sections with a *Col6a3*-specific antisense riboprobe and immunohistochemical detection of cell type markers

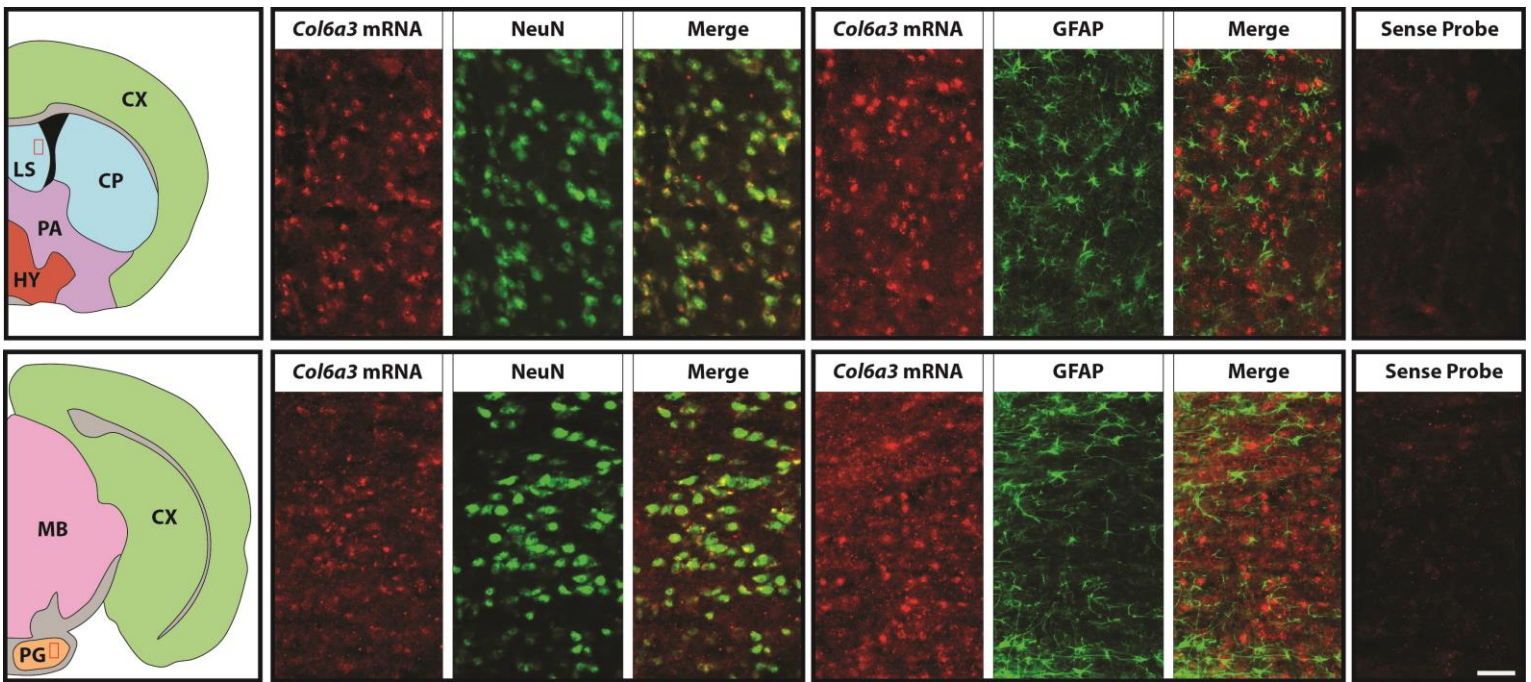

Simultaneous detection of *Col6a3* mRNA and neuronal cell marker NeuN (neuronal nuclear antigen), or astrocyte marker GFAP (glial fibrillary acidic protein) in the lateral septal nuclei (LS, top row) and the pontine grey (PG, bottom row). *Col6a3* mRNA co-localizes with NeuN-positive cells, but not with GFAP-positive cells (merged images). The sense probe indicates the specificity of the riboprobes used. CX=cortex, CP=caudate putamen, PA=pallidum, HY=hypothalamus, MB=midbrain. Scale bar represents 50  $\mu$ m.

**Figure S5** RT-PCR analysis of knockdown efficiency for splice-site targeted *col6a3* morpholinos

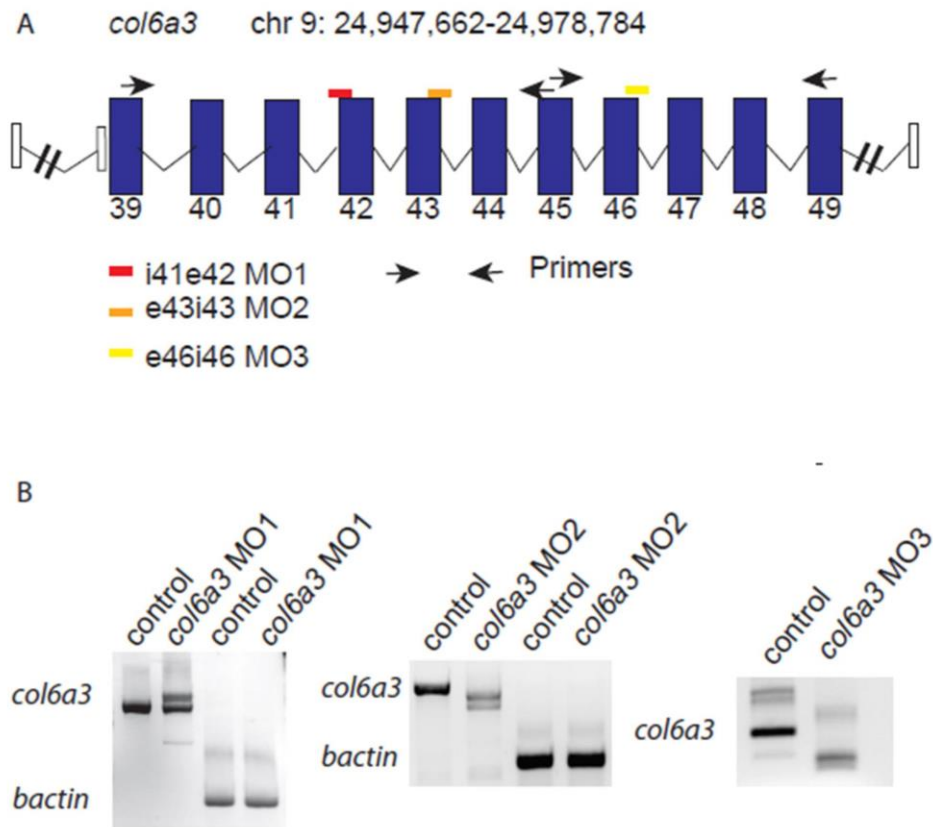

(A) Schematic of zebrafish *col6a3*. Splice blocking MOs designed against different *col6a3* exons: MO1 (red bar); MO2 (orange bar); MO3 (yellow bar). PCR primers (black arrows) designed against different exons were used to test MO efficiency. (B) In control embryos, there is a single amplicon, while in *col6a3* MO, there are two or three amplicons, demonstrating the efficiency of the MO used.

**Table S1** Whole-exome sequencing statistics

| Sample # | Reads      | Mapped reads | Percent | Mapped sequence (Gb) | Target bases |       |       |       | Average coverage |
|----------|------------|--------------|---------|----------------------|--------------|-------|-------|-------|------------------|
|          |            |              |         |                      | >1x          | >4x   | >8x   | >20x  |                  |
| F1-III-1 | 99,818,372 | 99,185,359   | 99.36   | 10.08                | 99.92        | 99.66 | 99.20 | 96.75 | 127.34           |
| F1-III-3 | 96,609,280 | 96,056,442   | 99.43   | 9.76                 | 99.80        | 99.54 | 99.08 | 96.78 | 125.85           |

**Table S2** Shared sequence variants in affected individuals (F1-III-1, F1-III-3) identified by whole-exome sequencing

|                                                                                    |      |
|------------------------------------------------------------------------------------|------|
| Synonymous variants                                                                | 9691 |
| NSVs                                                                               | 9857 |
| NSVs with MAF < 0.3% (3,640 in-house exomes, NHLBI-ESP (EA), HapMap, 1000 Genomes) | 102  |
| ≥ 2 NSVs with MAF < 0.3% / gene                                                    | 3    |

NSVs = non-synonymous variants (missense, nonsense, stop-loss, splicing, insertions, deletions); MAF = minor allele frequency; NHLBI-ESP = National Heart, Lung, and Blood Institute-exome sequencing project; EA = European American.



**Table S3** Candidate variants shared by individuals III-1 and III-3 of family F1 and Sanger sequencing validation

| Gene          | Genomic position (hg 19) | RefSeq transcript  | Variation           |                     | dbSNP142           | Mode       | Segregation (Sanger sequencing validation) |
|---------------|--------------------------|--------------------|---------------------|---------------------|--------------------|------------|--------------------------------------------|
|               |                          |                    | Nucleotide          | Amino acid          |                    |            |                                            |
| <b>COL6A3</b> | <b>chr2:238242176</b>    | <b>NM_004369.3</b> | <b>c.9245C&gt;G</b> | <b>p.Pro3082Arg</b> | <b>rs182976977</b> | <b>het</b> | <b>yes</b>                                 |
| <b>COL6A3</b> | <b>chr2:238243370</b>    | <b>NM_004369.3</b> | <b>c.9128G&gt;A</b> | <b>p.Arg3043His</b> | <b>rs552651651</b> | <b>het</b> | <b>yes</b>                                 |
| <i>LTBP1</i>  | chr2:33482431            | NM_206943.2        | c.2248G>A           | p.Val750Ile         | rs80163321         | het        | no                                         |
| <i>LTBP1</i>  | chr2:33484669            | NM_206943.2        | c.2410C>T           | p.Pro804Ser         | rs149319598        | het        | no                                         |
| <i>SPNS3</i>  | chr17:4342998            | NM_182538.4        | c.245A>G            | p.His82Arg          | not found          | het        | no                                         |
| <i>SPNS3</i>  | chr17:4389800            | NM_182538.4        | c.1372G>A           | p.Ala458Thr         | rs140121510        | het        | no                                         |

Under a recessive model, only rare non-synonymous variants (NSVs) in the homozygous state or heterozygous but accompanied by a second rare heterozygous NSV in the same gene were retained. “Rare” indicates a frequency < 0.3% in 4,300 European American exomes of the NHLBI-exome sequencing project, 3,640 in-house exomes, HapMap, and the 1000 Genomes project. NSVs encompass missense, nonsense, stop-loss, and splice-site mutations, as well as insertions and deletions. The filtering approach yielded six different heterozygous NSVs in three genes whereas no homozygous changes were identified. Sanger sequencing validation within family F1 revealed that none but the two heterozygous *COL6A3* NSVs segregated with the disease status (highlighted in bold). Het = heterozygous.

**Table S4** Demographics and clinical diagnoses of the German isolated dystonia cohort

| Type of dystonia    | No. (sex male/female) | Age at onset <sup>a</sup> | Age at sampling <sup>a</sup> | Family history positive no. (%) |
|---------------------|-----------------------|---------------------------|------------------------------|---------------------------------|
| Focal               | 257 (90/167)          | 47.2 ± 12.0 (5-81)        | 60.4 ± 15.9 (18-88)          | 30 (11.7)                       |
| Cervical dystonia   | 137 (52/85)           | 42.7 ± 13.6 (7-72)        | 56.9 ± 11.6 (28-84)          | 17 (12.4)                       |
| Blepharospasm       | 93 (29/64)            | 56.3 ± 14.8 (5-81)        | 68.3 ± 10.6 (26-88)          | 7 (7.5)                         |
| Writer`s cramp      | 9 (4/5)               | 32.2 ± 15.3 (14-62)       | 42.9 ± 19.7 (18-72)          | 1 (11.1)                        |
| Spasmodic dysphonia | 17 (4/13)             | 42.0 ± 20.9 (6-79)        | 55.4 ± 17.6 (26-80)          | 5 (29.4)                        |
| Foot                | 1 (1/0)               | 43                        | 48                           | 0                               |
| Segmental           | 100 (25/75)           | 50.1 ± 14.1 (8-75)        | 65.6 ± 11.3 (37-87)          | 16 (16.0)                       |
| Generalized         | 10 (6/4)              | 22.6 ± 18.8 (7-57)        | 53.5 ± 12.7 (29-69)          | 2 (20)                          |
| Total               | 367 (121/246)         | 46.9 ± 17.7 (5-81)        | 61.6 ± 13.4 (18-88)          | 48 (13.1)                       |

<sup>a</sup>Mean age in years ± standard deviation (range)

**Table S5** Rare non-synonymous *COL6A3* exon 41/42 variants detected in 367 German isolated dystonia cases and 376 controls by Sanger sequencing

| Exon <sup>a</sup> | Genomic position (hg19) | Variation nucleotide <sup>a</sup> | Variation amino acid <sup>a</sup> | Mutation type    | dbSNP142    | Frequency NHLBI-ESP (EA) | Carrier # | Sex/ Age at sampling | Dystonia distribution/ Age at onset | Additional rare NSV    |
|-------------------|-------------------------|-----------------------------------|-----------------------------------|------------------|-------------|--------------------------|-----------|----------------------|-------------------------------------|------------------------|
| 41                | chr2:238243533          | c.8966-1G>C                       | p.Val2989_Lys3077del              | canonical splice | not found   | not found                | Dys1      | M/66                 | focal/24                            | p.Arg2501His (exon 36) |
|                   |                         |                                   |                                   |                  |             |                          | Dys2      | M/57                 | segmental/8                         | p.Ala2554Thr (exon 36) |
| 41                | chr2:238243520          | c.8978G>A                         | p.Arg2993His                      | missense         | rs201888442 | T=4/C=8596               | Ctrl1     | F/83                 | control                             | none                   |
| 41                | chr2:238243370          | c.9128G>A                         | p.Arg3043His                      | missense         | rs552651651 | not found                | Dys3      | M/53                 | focal/<10                           | none                   |
| 41                | chr2:238243350          | c.9148G>A                         | p.Ala3050Thr                      | missense         | rs114596320 | not found                | Dys4      | F/60                 | focal/54                            | none                   |
| 41                | chr2:238243313          | c.9185T>G                         | p.Leu3062Arg                      | missense         | not found   | not found                | Dys5      | F/69                 | segmental/51                        | none                   |
| 42                | chr2:238242176          | c.9245C>G                         | p.Pro3082Arg                      | missense         | rs182976977 | C=8/G=8592               | Dys6      | F/40                 | segmental/37                        | none                   |
|                   |                         |                                   |                                   |                  |             |                          | Dys7      | F/62                 | segmental/ 53                       | none                   |
|                   |                         |                                   |                                   |                  |             |                          | Ctrl2     | F/82                 | control                             | none                   |
|                   |                         |                                   |                                   |                  |             |                          | Ctrl3     | M/66                 | control                             | none                   |

The collagen VI  $\alpha 3$  C4 domain (fibronectin type-III motif) encoding exons 41 and 42 were Sanger sequenced in 367 isolated dystonia cases from Germany and 376 ancestry-matched controls. When a rare non-synonymous variant (NSV) was identified, Sanger sequencing of the entire *COL6A3* coding region ensued to detect additional rare NSVs. "Rare" indicates a frequency < 0.3% in 4,300 European American (EA) exomes of the NHLBI-exome sequencing project (ESP) and 3,640 exomes in the in-house database. NSVs encompass missense, nonsense, stop-loss, and splice-site mutations, as well as insertions and deletions. Seven individuals with isolated dystonia and three control subjects carried rare NSVs in exons 41/42. The two individuals positive for the exon 41 canonical splice site mutation c.8966-1G>C (Dys1 and Dys2) carried a second rare *COL6A3* coding sequence alteration (a missense mutation in exon 36). Families of individuals Dys1 and Dys2 were further investigated (families F2 and F3 in Figure 1, individual Dys1 corresponds to individual F2-II-2 and individual Dys2 to individual F3-II-3 in Figure 1). F = female; M = male. <sup>a</sup>Numbering according to NCBI accessions NM\_004369.3 and NP\_004360.2.

**Table S6** Rare non-synonymous *COL6A3* coding sequence variants detected in 360 German isolated dystonia cases and 373 controls without rare *COL6A3* exon 41/42 variants by high-resolution melting curve analysis

| Exon <sup>a</sup> | Genomic position (hg19)  | Variation nucleotide <sup>a</sup> | Variation amino acid <sup>a</sup> | Mutation type | dbSNP142    | Frequency NHLBI-ESP (EA) | Carrier # | Sex/ Age at sampling | Dystonia distribution/ Age at onset | Additional rare NSV |
|-------------------|--------------------------|-----------------------------------|-----------------------------------|---------------|-------------|--------------------------|-----------|----------------------|-------------------------------------|---------------------|
| 3                 | chr2:238303650           | c.289C>A                          | p.Arg97Ser                        | missense      | not found   | not found                | Ctrl4     | M/70                 | control                             | none                |
| 4                 | chr2:238296695-238296697 | c.840_842 delAGT                  | p.Val281del                       | deletion      | not found   | not found                | Dys8      | M/86                 | segmental/48                        | none                |
| 4                 | chr2:238296513           | c.1024G>A                         | p.Val342Met                       | missense      | rs111402193 | T=8/C=8592               | Dys9      | F/40                 | focal/39                            | none                |
|                   |                          |                                   |                                   |               |             |                          | Dys10     | F/39                 | focal/39                            | none                |
|                   |                          |                                   |                                   |               |             |                          | Ctrl5     | F/68                 | control                             | none                |
| 4                 | chr2:238296320           | c.1217G>A                         | p.Arg406His                       | missense      | not found   | not found                | Dys11     | M/29                 | generalized/8                       | none                |
| 4                 | chr2:238296309           | c.1228G>A                         | p.Asp410Asn                       | missense      | rs35914491  | T=6/C=8594               | Ctrl6     | F/81                 | control                             | none                |
| 5                 | chr2:238290075           | c.1380C>G                         | p.Asn460Lys                       | missense      | not found   | not found                | Ctrl7     | F/72                 | control                             | none                |
| 6                 | chr2:238287473           | c.2303G>A                         | p.Arg768His                       | missense      | rs575412915 | not found                | Dys12     | M/47                 | focal/44                            | none                |
| 7                 | chr2:238285960           | c.2525T>C                         | p.Phe842Ser                       | missense      | rs369930821 | G=1/A=8599               | Dys13     | M/69                 | focal/48                            | none                |
| 7                 | chr2:238285819           | c.2666G>A                         | p.Arg889His                       | missense      | rs111295967 | not found                | Dys14     | M/41                 | focal/40                            | none                |
| 7                 | chr2:238285811           | c.2674G>A                         | p.Glu892Lys                       | missense      | not found   | not found                | Ctrl8     | F/75                 | control                             | none                |
| 7                 | chr2:238285477           | c.3008G>A                         | p.Gly1003Glu                      | missense      | not found   | not found                | Ctrl9     | M/75                 | control                             | none                |
| 7                 | chr2:238285445           | c.3040A>G                         | p.Lys1014Glu                      | missense      | rs114284669 | C=3/T=8597               | Ctrl10    | F/66                 | control                             | none                |
|                   |                          |                                   |                                   |               |             |                          | Ctrl11    | F/84                 | control                             | none                |
| 8                 | chr2:238283511           | c.3223C>T                         | p.Arg1075Trp                      | missense      | rs201962257 | A=1/G=8599               | Ctrl12    | F/78                 | control                             | none                |
| IVS9              | chr2:238280984           | c.3680-4 G>A                      |                                   | near-splice   | rs376123972 | T=3/C=8597               | Dys15     | F/75                 | focal/71                            | none                |
| 9                 | chr2:238280808           | c.3852C>A                         | p.Phe1284Leu                      | missense      | rs148561729 | T=7/G=8593               | Ctrl13    | F/75                 | control                             | none                |
|                   |                          |                                   |                                   |               |             |                          | Ctrl14    | M/69                 | control                             | none                |
| 9                 | chr2:238280803           | c.3857T>C                         | p.Leu1286Pro                      | missense      | not found   | not found                | Dys16     | F/65                 | focal/52                            | none                |
| 9                 | chr2:238280759           | c.3901C>T                         | p.Arg1301Trp                      | missense      | rs150430813 | A=1/G=8599               | Dys17     | F/62                 | focal/14                            | none                |
| 9                 | chr2:238280737           | c.3923G>A                         | p.Arg1308Gln                      | missense      | not found   | not found                | Dys18     | F/77                 | focal/63                            | none                |

|       |                |              |              |             |             |            |        |      |                |      |
|-------|----------------|--------------|--------------|-------------|-------------|------------|--------|------|----------------|------|
| 9     | chr2:238280557 | c.4103C>T    | p.Thr1368Met | missense    | rs116505603 | A=7/G=8593 | Ctrl15 | F/72 | control        | none |
| 9     | chr2:238280543 | c.4117G>A    | p.Ala1373Thr | missense    | rs112181324 | T=7/C=8593 | Dys19  | F/53 | focal/37       | none |
|       |                |              |              |             |             |            | Dys20  | F/74 | segmental/65   | none |
|       |                |              |              |             |             |            | Ctrl16 | F/82 | control        | none |
|       |                |              |              |             |             |            | Ctrl17 | M/85 | control        | none |
| 9     | chr2:238280539 | c.4121A>T    | p.Asp1374Val | missense    | not found   | not found  | Dys21  | F/70 | focal/70       | none |
| 9     | chr2:238280476 | c.4184G>A    | p.Arg1395Gln | missense    | rs80272723  | T=5/C=8595 | Dys22  | M/18 | focal/14       | none |
|       |                |              |              |             |             |            | Ctrl18 | M/74 | control        | none |
| 11    | chr2:238275489 | c.5341A>G    | p.Ile1781Val | missense    | rs145447965 | C=1/T=8599 | Dys23  | F/88 | focal/70       | none |
| 12    | chr2:238274346 | c.5833G>A    | p.Val1945Met | missense    | not found   | not found  | Dys24  | M/44 | focal/35       | none |
| IVS13 | chr2:238273074 | c.5839-3 C>T |              | near-splice | rs112825341 | A=2/G=8598 | Dys25  | F/67 | focal/44       | none |
| 14    | chr2:238271954 | c.6005A>T    | p.Tyr2002Phe | missense    | not found   | not found  | Dys26  | M/40 | focal/36       | none |
| 14    | chr2:238271906 | c.6053C>T    | p.Ala2018Val | missense    | rs200239695 | A=1/G=8599 | Dys27  | M/55 | focal/53       | none |
| 17    | chr2:238268772 | c.6241A>T    | p.Thr2081Ser | missense    | not found   | not found  | Dys28  | F/78 | segmental/54   | none |
| 21    | chr2:238267204 | c.6431A>T    | p.Glu2144Val | missense    | not found   | not found  | Ctrl19 | F/81 | control        | none |
| 23    | chr2:238265998 | c.6574G>A    | p.Gly2192Arg | missense    | not found   | not found  | Ctrl20 | F/73 | control        | none |
| 28    | chr2:238258801 | c.6868C>T    | p.Arg2290Cys | missense    | rs116608946 | A=3/G=8597 | Dys29  | F/83 | segmental/60   | none |
| 36    | chr2:238253403 | c.7258C>T    | p.Arg2420Trp | missense    | rs150165484 | A=8/G=8592 | Dys30  | F/63 | focal/62       | none |
| 37    | chr2:238250725 | c.7748C>T    | p.Thr2583Met | missense    | rs140021275 | A=2/G=8598 | Dys31  | M/69 | segmental/58   | none |
|       |                |              |              |             |             |            | Ctrl21 | F/76 | control        | none |
| 38    | chr2:238249751 | c.7808G>A    | p.Arg2603Lys | missense    | rs150554876 | T=1/C=8599 | Dys32  | M/63 | focal/53       | none |
| 38    | chr2:238249631 | c.7928C>T    | p.Ala2643Val | missense    | rs111595697 | A=7/G=8593 | Dys33  | M/38 | focal/30       | none |
| 38    | chr2:238249550 | c.8009C>T    | p.Ala2670Val | missense    | rs142851023 | A=5/G=8595 | Ctrl22 | F/71 | control        | none |
| 43    | chr2:238234338 | c.9358A>C    | p.Thr3120Pro | missense    | rs141050617 | G=1/T=8599 | Dys34  | M/59 | generalized/10 | none |
|       |                |              |              |             |             |            | Dys35  | M/75 | focal/67       | none |
| 43    | chr2:238234219 | c.9477A>C    | p.Glu3159Asp | missense    | not found   | not found  | Ctrl23 | M/82 | control        | none |

By means of high-resolution melting, *COL6A3* exons 1-40 and 43-44 were analyzed in 360 isolated dystonia cases from Germany and 373 ancestry-matched controls without rare non-synonymous variants (NSVs) in *COL6A3* exons 41/42. "Rare" indicates a frequency < 0.3% in 4,300 European American (EA) exomes of the NHLBI exome sequencing project (ESP) and 3,640 exomes in the in-house database. NSVs encompass missense, nonsense, stop-loss, and splice-site mutations, as well as insertions and deletions. Samples positive for more than one rare NSV were not identified. F = female; M = male. <sup>a</sup>Numbering according to NCBI accessions NM\_004369.3 and NP\_004360.2.

**Table S7** Clinical, laboratory, imaging, and cellular investigations to exclude muscular pathology in families F1, F2, and F3

| Individual    | Status     | Muscle weakness | Joint contractures | “Bethlem sign” | Joint hyperlaxity | Spinal rigidity | Skin abnormalities | Vital capacity in liters (respiratory involvement) | Serum creatine kinase level | Muscle MRI                                             | Collagen VI immunolabeling in skin fibroblasts |
|---------------|------------|-----------------|--------------------|----------------|-------------------|-----------------|--------------------|----------------------------------------------------|-----------------------------|--------------------------------------------------------|------------------------------------------------|
| Family 1 (F1) |            |                 |                    |                |                   |                 |                    |                                                    |                             |                                                        |                                                |
| F1-II-1       | unaffected | absent          | absent             | negative       | absent            | absent          | absent             | N/A                                                | N/A                         | N/A                                                    | normal                                         |
| F1-II-2       | unaffected | absent          | absent             | negative       | absent            | absent          | absent             | N/A                                                | N/A                         | N/A                                                    | normal                                         |
| F1-III-1      | affected   | absent          | absent             | negative       | absent            | absent          | absent             | 3.5 (absent)                                       | normal                      | normal                                                 | normal                                         |
| F1-III-2      | unaffected | absent          | absent             | negative       | absent            | absent          | absent             | N/A                                                | N/A                         | N/A                                                    | N/A                                            |
| F1-III-3      | affected   | absent          | absent             | negative       | absent            | absent          | absent             | 2.9 (absent)                                       | normal                      | mild atrophic aspect likely due to physical inactivity | normal                                         |
| Family 2 (F2) |            |                 |                    |                |                   |                 |                    |                                                    |                             |                                                        |                                                |
| F2-II-2       | affected   | absent          | absent             | negative       | absent            | absent          | absent             | N/A                                                | normal                      | N/A                                                    | normal                                         |
| F2-II-3       | affected   | absent          | absent             | negative       | absent            | absent          | absent             | 3.1 (absent)                                       | normal                      | normal                                                 | normal                                         |
| F2-III-1      | unaffected | absent          | absent             | negative       | absent            | absent          | absent             | N/A                                                | N/A                         | N/A                                                    | N/A                                            |
| Family 3 (F3) |            |                 |                    |                |                   |                 |                    |                                                    |                             |                                                        |                                                |
| F3-I-5        | unaffected | absent          | absent             | negative       | absent            | absent          | absent             | N/A                                                | N/A                         | N/A                                                    | N/A                                            |
| F3-II-2       | unaffected | absent          | absent             | negative       | absent            | absent          | N/A                | N/A                                                | N/A                         | N/A                                                    | N/A                                            |
| F3-II-3       | affected   | absent          | absent             | negative       | absent            | absent          | absent             | 3.6 (absent)                                       | normal                      | normal                                                 | normal                                         |

The phenotypic profile of *COL6A3*-related muscular disorders such as Ullrich congenital muscular dystrophy (UCMD) and Bethlem myopathy (BM) is characterized by pronounced proximal muscle weakness, joint contractures, joint hyperlaxity, spinal rigidity, skin abnormalities (e.g. follicular hyperkeratosis, abnormal scarring), and potential respiratory insufficiency. “Bethlem sign” defines a clinical test to aid in the recognition of subtle long finger flexor contractures. None of these clinical hallmarks were present in members of families F1, F2, and F3. Moreover, in all family members affected by isolated dystonia, serum creatinine kinase levels were in the normal range, and muscle MRI of pelvis and thigh did not show a pattern suggestive of myopathic or dystrophic changes. Finally, collagen VI immunolabeling in fibroblasts derived from isolated dystonia proband skin biopsies was not indicative of UCMD or BM, with the absence of typical alterations such as intracellular retention of collagen VI, diminished collagen VI secretion, or disorganization of collagen VI microfibrils. N/A = not available.

**Table S8** COL6A3 genomic and cDNA primer sequences

| Genomic primers |                          |                           |
|-----------------|--------------------------|---------------------------|
| Exon            | Forward Primer           | Reverse Primer            |
| ex2             | ATCCCTTTGCCCTGTTTTC      | TATGTCAGTGCCTGATGTCTAAG   |
| ex3_1           | ACCAAATTTGTTTAGGAAGGC    | CCATCCTTCGAGTGTCCATC      |
| ex3_2           | GAACCAATCAGACTGGAAAAGG   | CAGTTGCCAAGCTCATCTCC      |
| ex4_1           | GGTTTCAAAGAAACATGTCAG    | CTACCACCCCGTAGCGAATC      |
| ex4_2           | CCTCGCCCTTGATTTG         | ATGCTGGTACCCACCTTACG      |
| ex5_1           | GGTGTCCTTAAATGGAGTTAGC   | CCAAAAGCTTAGGAATCCCC      |
| ex5_2           | GAAATGAAGCCCCTGGAC       | GTTCTTAAAGCCCCTGCCTG      |
| ex6_1           | TGTGCACGTGTTGTAGGCAC     | CAGAAGCAGGAGCTGCG         |
| ex6_2           | TTCGGGCCTGAACACAG        | TCGACTGGCAAACCTACCCTC     |
| ex7_1           | CGCTTTGGTTCCTGTTATGC     | GGAACTGAAGCACTCCATCC      |
| ex7_2           | AGATCAAGACGGGCAAAGC      | AGCCTACCCTCAACTCATGC      |
| ex8_1           | TTTGGACTTGACATCCCTG      | ATCATCCCCAGACCTGTGCG      |
| ex8_2           | GCCCTGGAGTTTGCCTG        | CCAGACAAGTAGCCCCAGAC      |
| ex9_1           | GGTGGCTCATGAACGCTAAG     | TTCCAGACGAGATGAGGACC      |
| ex9_2           | CAATGCCCTGGAGTACGTG      | GAGTACCATGGCCTTTGAGC      |
| ex10_1          | CCTGGGTGAGGGCTACTTAC     | ATCGTCCTGGGATTTTCCAC      |
| ex10_2          | CCACTGAACACTGGCAAGG      | GAAGAAACAACCCAGAGAGAAG    |
| ex11_1          | TGTGATTTATGTTCTGGGTCTGG  | ACAAAGGCAATCTGAGGGAC      |
| ex11_2          | CAACACTAAGGTGGGCCTTG     | CCAGGGACCAGACAGCTAAAG     |
| ex12            | AGAGTTCGTCTCCTCAGCCC     | GAAGGGCTTCCTCCTTTCC       |
| ex13            | GCGAGTCTCTCAGTTTTCTATCAG | CAGTACACCCCGCCTCAC        |
| ex14            | ATTGCATTTTCCACATGCC      | TCTTGAAATGCCAAAAGGTG      |
| ex15            | TTTATGATTTTCTGCTGGGC     | GTCGGGCTTCTGACACC         |
| ex16            | GGGGACCACAGGGATTG        | CCAATGGGTAAGGATCAAGG      |
| ex17            | GAGAAAGGGTGATGAAGGGC     | CAGCATCTGGAGAACTGC        |
| ex18-20         | ACAGCCCTTGGCCTCTTC       | TTCCCTAAATGAAATGTTGATATTC |
| ex21            | TTGCCTTCATGGTGAATGAG     | TTCCAACAACCCTCTTCC        |
| ex22            | CCTGACCATCCAGTCCAGTG     | GCCGAGAAGTGTGTCTTTTC      |
| ex23            | TGTCTTGTGCAGCATTTTCTAG   | TTGGGCAGATCTTATGGCAC      |
| ex24            | CTGAAAGAGCTCTAGGCCCC     | TTTTCACTCCTGGGCTGG        |
| ex25            | GAGCTGACATTGACAGGAACC    | CCGATATAAATGCCACCC        |
| ex26            | GCTTCTCATGGAAAGTCACC     | GAAACTCTCTCAGCCTGCTTG     |
| ex27            | AGAGACCAATTTGCCTGGAC     | CTGACCAAAGAGGGAGAGGG      |
| ex28            | ATCACACTGTAAGCCAGCCC     | GCACCTTCCAGCAAAGAGTC      |
| ex29-30         | GGCAGAGACGGTGGTTATG      | GGACATACCAGAGCCATCCC      |
| ex31            | TCCTGGATGTCTTACCCAC      | AATTGTCAAAGCCTCAGCAG      |



|                                                 |                           |                            |
|-------------------------------------------------|---------------------------|----------------------------|
| ex32                                            | TCCA ACTATAGGAGCCTTAAATTC | AGGGACCACGTGTAAAGCAC       |
| ex33-35                                         | GGGCCAAAGCCTGTTTATTC      | CTGTACTTACTACAAAAGGGAGGC   |
| ex36                                            | TTCTCCTAAGGAAAGGAAGCC     | AACCTTCTCAGAGCCCCAG        |
| ex37                                            | TGTAGCTTTGATTTACTCCTCTGC  | TCCCATGGATATTATGTTTTGC     |
| ex38_1                                          | AGCTGTGTATCCTGCTGTGG      | CTTTC AAAGACATTCTCTATGGTG  |
| ex38_2                                          | CCCTGACTGACTATGGCTCC      | CCTACACTTCTCCTGGCCC        |
| ex39                                            | TGTGATTCATTTAACTTGTTGACAG | CCCATAAAGTCAGGAGGTGG       |
| ex40                                            | TGTAGCTCATGGGGTTATGTC     | ACCCTGGAGCAGGAAATGAG       |
| ex41                                            | CCTCTCTCGCTCATGCACTAC     | TCCTTTGTGCCTATTTGATACTCTAC |
| ex42                                            | CTAAGGATTCCCAAGCCCTC      | TTGGAATCAAGATGGGTATTTTC    |
| ex43                                            | CACTGGGAGCCGAGTAACAC      | CAAGGTGACTTATTGACCTGAATC   |
| ex44                                            | CTTTTGGGTCAGTAATGTGGC     | GTTGGCGATGGCTGACTC         |
| cDNA primers                                    |                           |                            |
|                                                 | Forward Primer            | Reverse Primer             |
| exon 41<br>canonical<br>splice site<br>mutation | AAGCCAGCAGCTGTAAGACC      | GCAAGTTCCTTCGTCTTTCCG      |

Primer pairs used for direct sequencing of genomic DNA and cDNA, and for high-resolution melting curve analysis of COL6A3 (NM\_004369.3).

**Table S9** Expression data from five days post fertilization zebrafish heads in CPM (count per million reads)

| <b>Gene</b>   | <b>Average (CPM)</b> | <b>STDEV</b> |
|---------------|----------------------|--------------|
| <b>COL6A3</b> | 156.2                | 110.32       |
| <b>TOR1A</b>  | 0                    | 0            |
| <b>THAP1</b>  | 5.2                  | 1.37         |
| <b>GNAL</b>   | 15.58                | 3.64         |
| <b>ANO3</b>   | 1.91                 | 1.23         |
| <b>GDAPH</b>  | 874.62               | 373.72       |

The zebrafish RNAseq data can be retrieved from the NCBI Gene Expression Omnibus (GEO; <http://www.ncbi.nlm.nih.gov/geo/>) under accession number GSE63191.
